# Supplementary material for: Enhanced alkaline bifunctional electrocatalytic water splitting achieved through N and S dual-doped carbon shell reinforced Co9S8microplates
Source: Royal Society of Chemistry journal article supplement (doi:10.1039/d2nj03810b), 2022-01-01
Supplement: d2nj03810b1.pdf [file d2nj03810b1.pdf]

## (Supplementary information)

# Enhanced Alkaline Bifunctional Electrocatalytic Water Splitting Achieved Through N and S Dual Doped Carbon Shell Reinforced Co<sub>9</sub>S<sub>8</sub> Microplates

Mudasir Dar, <sup>a</sup> Kowsar Majid, <sup>a\*</sup> and Malik Wahid <sup>a\*</sup>

<sup>a</sup>Department of Chemistry  
Interdisciplinary Division for Renewable Energy and Advanced Materials (iDREAM),  
NIT Srinagar. Srinagar-190006, India.  
E-mail: [malikwahid15@gmail.com](mailto:malikwahid15@gmail.com); [kowsar@nitsri.in](mailto:kowsar@nitsri.in)

|                          |           |
|--------------------------|-----------|
| <b>Number of pages</b>   | <b>12</b> |
| <b>Number of figures</b> | <b>09</b> |
| <b>Number of tables</b>  | <b>03</b> |

### Calculations:

#### 1. XPS calculations:

XPSPEAK 4.1 fitting software was used to analyze individual peak areas to determine the synthesized sample's relative surface elemental composition. Areas (A) enclosed by individual peaks and the relative atomic sensitivity factors (F) of 0.25, 0.66, 0.42, 0.54, and 3.8 for C1s, O1s, N1s S 2p, and Co 2p, respectively, were put in equation S1 to calculate the relative atomic compositions.

$$\text{Relative atomic \% of Z} = (A_z/F_z) / [(A_z/F_z) + (A_y/F_y)] \quad \text{.....Eqn. (S1)}$$

A standard fitting procedure in XPSPEAK 4.1 was adopted to deconvolute individual C1s, O1s, and N1s peaks into their possible functional group peaks by fitting standard binding energy values from the literature.

#### 2. IR-correction, Tafel slope, and overpotential calculations:

The LSV measurements were rectified for electrolyte resistance using equation S2.

$$E_{\text{corrected}} = E - IR \quad \text{.....Eqn. (S2)}$$

Here, I is the measured current (A), R is the uncompensated solution resistance (ohm), and E is the potential applied (V).

The overpotentials ( $\eta$ ) are calculated using:

$$\eta = E_{\text{corrected}} - E_{\text{rev}}$$

Where  $E_{\text{rev}}$  is the thermodynamic potential (V). On RHE scale,  $E_{\text{rev}}$  is 0 V for HER. Therefore, the  $E_{\text{corrected}}$  is equal to applied  $\eta$ . For OER, the  $E_{\text{rev}}$  is 1.23 V vs. RHE, and the  $\eta$  will be

$$\eta = E_{\text{corrected}} - 1.23 \text{ V}$$

Tafel plots for HER and OER are obtained from their respective LSV curves, and the Tafel slopes were calculated as per the Tafel equation:

$$\eta = a + b \log j$$

Where a, b, and j represent the Tafel constant, Tafel slope, and current density, respectively.

### 3. Calculation of Electrochemical active surface area (ECSA):

ECSA was determined using the cyclic voltammetry (CV) technique, involving double-layer capacitance measurement ( $C_{dl}$ ) of electrocatalysts in the non-Faradiac region. In a typical procedure, carbon fiber modified with an active catalyst acting as a working electrode, Pt mesh, and Ag/AgCl as counter and reference electrodes were used in 1 M KOH solution. CV scans of electrocatalysts were recorded at scan rates of 20, 40, 60, 80, 100, 120, 140, 160, 180 and 200  $\text{mV sec}^{-1}$  in a non-Faradiac potential window of 0 - 0.3 V vs. Ag/AgCl electrode. The value of  $C_{dl}$  is equal to half of the slope of  $\Delta I = (J_a - J_c)$  at 0.15 V vs. scan rate curve. The ECSA was then calculated using the equation:

$$\text{ECSA} \approx C_{dl} / C_s$$

Where  $C_s$  is the specific capacitance, defined as capacitance per unit area of an atomically smooth planar electrocatalyst surface, the value of  $C_s$  is reported as 40  $\mu\text{F}$  in 1 M KOH solution.

### Supplementary figures and tables.

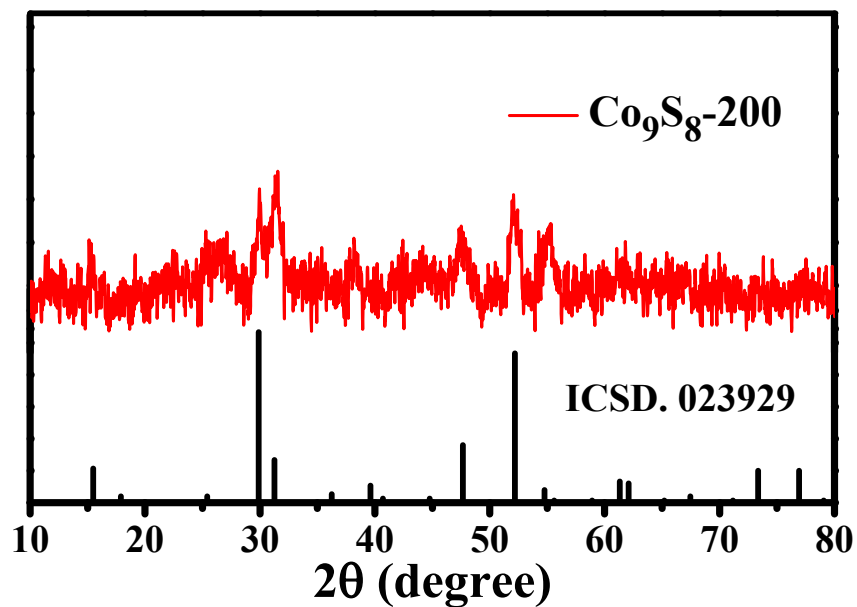

**Figure S1.** XRD pattern of hydrothermally synthesized  $\text{Co}_9\text{S}_8$ -200 sample

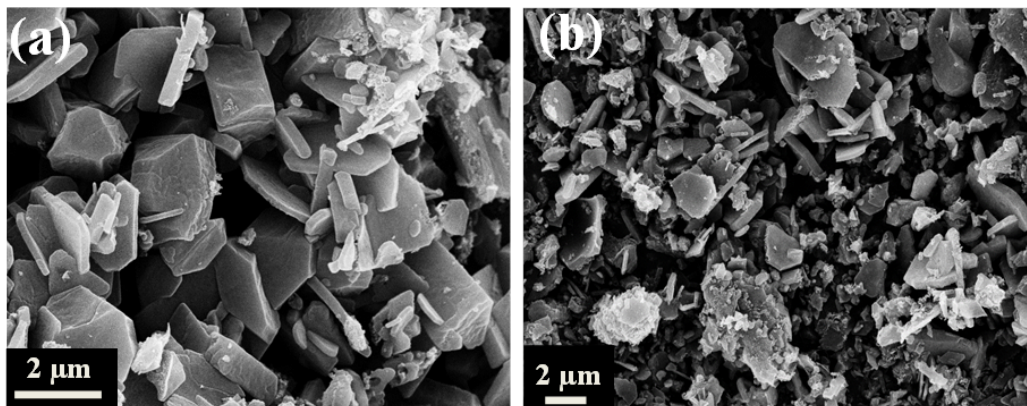

Figure S2. (a) FESEM image of  $\text{Co}_9\text{S}_8@\text{NSC-10}$ . (b) FESEM image of  $\text{Co}_9\text{S}_8@\text{NSC-6}$ .

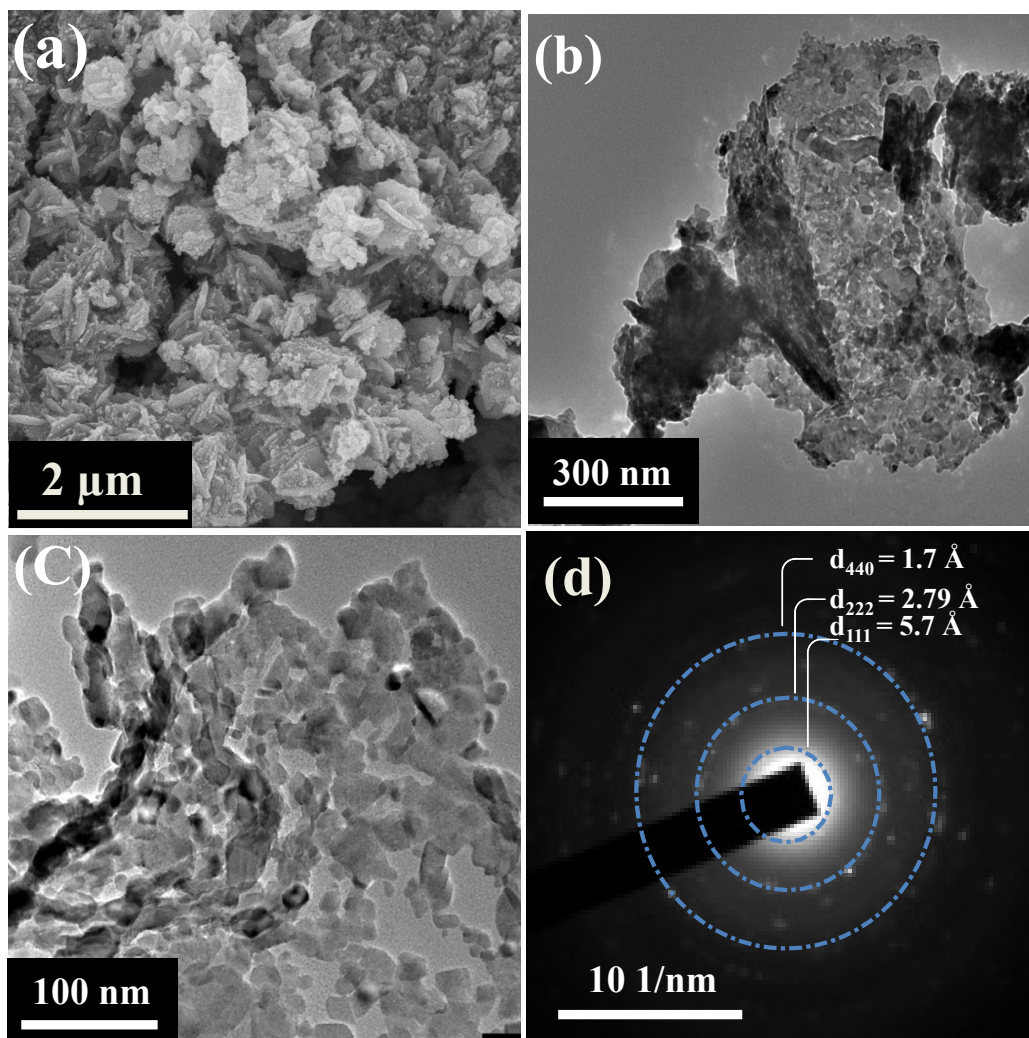

Figure S3. (a) FESEM image of  $\text{Co}_9\text{S}_8\text{-800}$ . (b) and (c) HRTEM images of  $\text{Co}_9\text{S}_8\text{-800}$ . (d) SAED pattern of  $\text{Co}_9\text{S}_8\text{-800}$ .

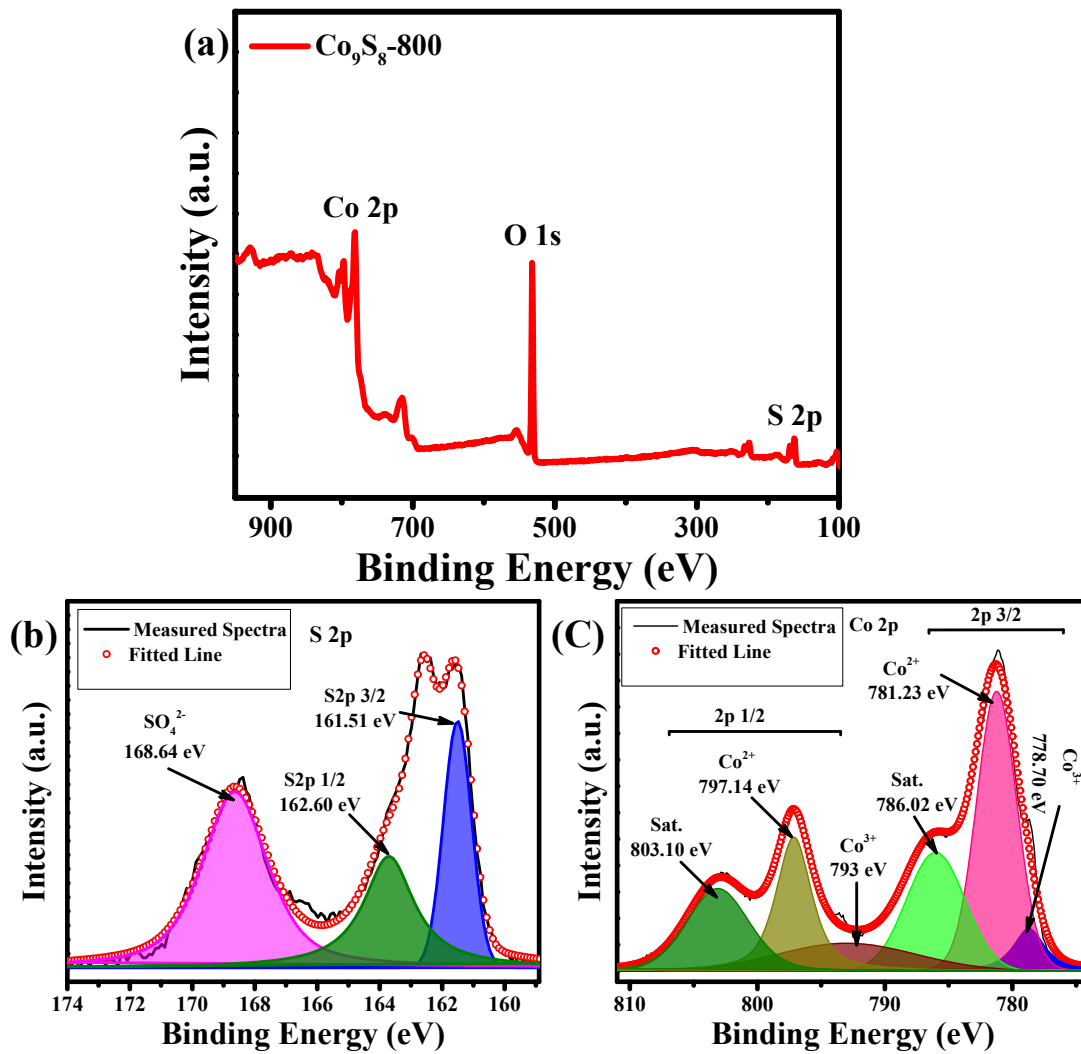

Figure S4. (a) XPS survey spectrum of  $\text{Co}_9\text{S}_8$ ; deconvoluted XPS spectra of: (b) S 2p, (c) Co 2p of  $\text{Co}_9\text{S}_8$  material.

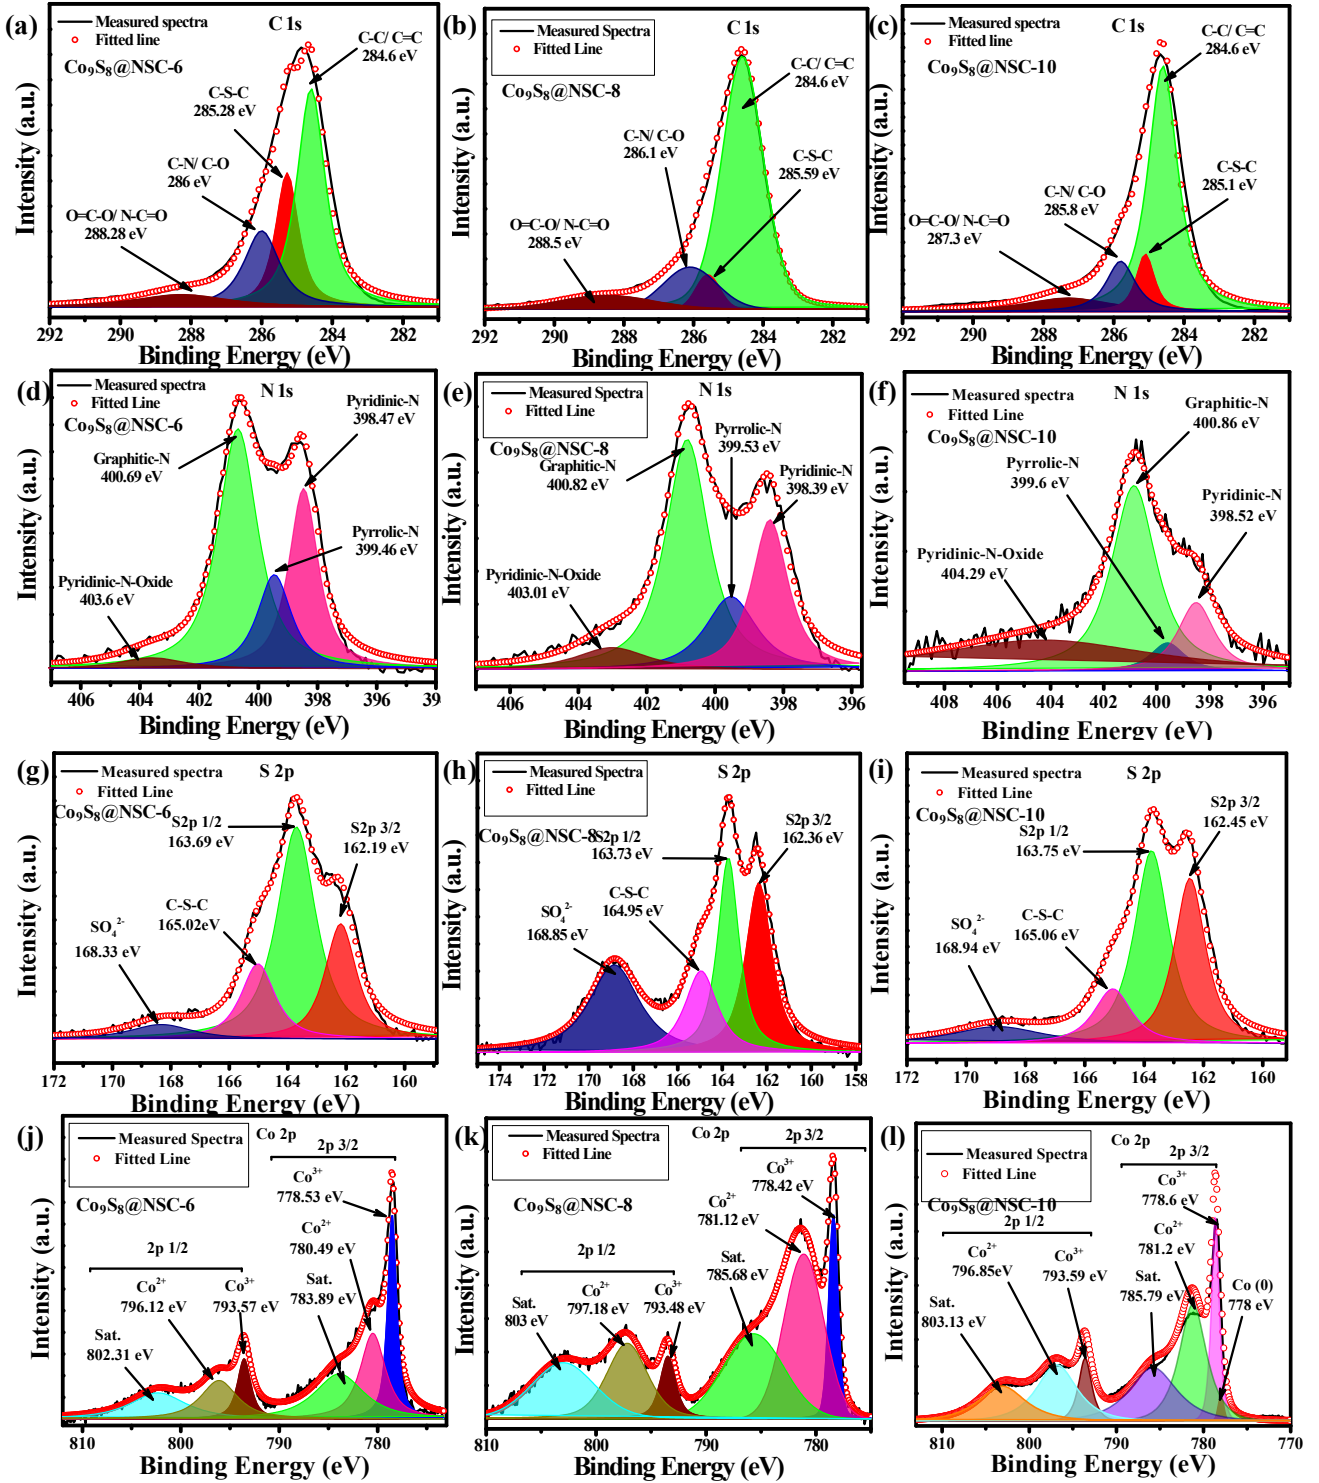

**Figure S5.** Deconvoluted XPS spectra: (a) C1s of  $\text{Co}_9\text{S}_8@\text{NSC-6}$ , (b) C1s of  $\text{Co}_9\text{S}_8@\text{NSC-8}$ , (c) C1s of  $\text{Co}_9\text{S}_8@\text{NSC-10}$ , (d) N1s of  $\text{Co}_9\text{S}_8@\text{NSC-6}$ , (e) N1s of  $\text{Co}_9\text{S}_8@\text{NSC-8}$ , (f) N1s of  $\text{Co}_9\text{S}_8@\text{NSC-10}$ , (g) S 2p of  $\text{Co}_9\text{S}_8@\text{NSC-6}$ , (h) S 2p of  $\text{Co}_9\text{S}_8@\text{NSC-8}$ , (i) S 2p of  $\text{Co}_9\text{S}_8@\text{NSC-10}$ , (j) Co 2p of  $\text{Co}_9\text{S}_8@\text{NSC-6}$ , (k) Co 2p of  $\text{Co}_9\text{S}_8@\text{NSC-8}$ , (l) Co 2p of  $\text{Co}_9\text{S}_8@\text{NSC-10}$ .

**Table S1.** XPS functional group analysis of Co<sub>9</sub>S<sub>8</sub>@NSC samples.

|                   |                 |                    | Sample                                |                                       |                                        |        |
|-------------------|-----------------|--------------------|---------------------------------------|---------------------------------------|----------------------------------------|--------|
|                   |                 |                    | Co <sub>9</sub> S <sub>8</sub> @NSC-6 | Co <sub>9</sub> S <sub>8</sub> @NSC-8 | Co <sub>9</sub> S <sub>8</sub> @NSC-10 |        |
| Carbon            | C-C/ C=C        | Peak Position (eV) | 284.6                                 | 284.6                                 | 284.6                                  |        |
|                   |                 | %                  | 46.9                                  | 73.3                                  | 66.3                                   |        |
|                   | C-S-C           | Peak Position (eV) | 285.28                                | 285.59                                | 285.1                                  |        |
|                   |                 | %                  | 23.4                                  | 5                                     | 9.6                                    |        |
|                   | C-N/ C-O        | Peak Position (eV) | 286                                   | 286.1                                 | 285.8                                  |        |
|                   |                 | %                  | 20.6                                  | 13.9                                  | 13.4                                   |        |
|                   | O=C-O/<br>N-C=O | Peak Position (eV) | 288.28                                | 288.5                                 | 287.3                                  |        |
|                   |                 | %                  | 9.1                                   | 7.7                                   | 10.7                                   |        |
|                   | Nitrogen        | Pyridinic N        | Peak Position (eV)                    | 398.47                                | 398.39                                 | 398.52 |
|                   |                 |                    | %                                     | 28.4                                  | 26.4                                   | 13.4   |
| pyrrolic N        |                 | Peak Position (eV) | 399.46                                | 399.53                                | 399.60                                 |        |
|                   |                 | %                  | 17.1                                  | 18                                    | 5.1                                    |        |
| Graphitic N       |                 | Peak Position (eV) | 400.69                                | 400.82                                | 399.60                                 |        |
|                   |                 | %                  | 50.7                                  | 47.9                                  | 45.2                                   |        |
| Graphitic N oxide |                 | Peak Position (eV) | 403.6                                 | 403.01                                | 404.29                                 |        |
|                   |                 | %                  | 3.8                                   | 7.7                                   | 36.2                                   |        |

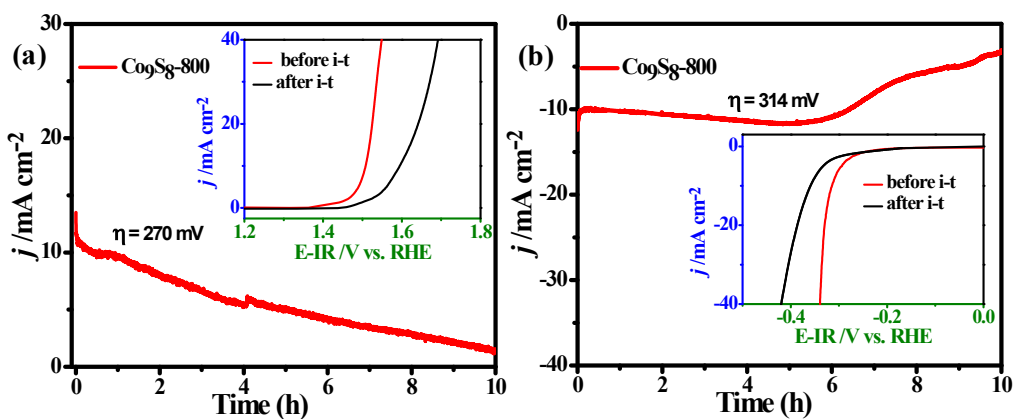

**Figure S6.** Long-term chronoamperometric (i-t curve) durability test of  $\text{Co}_9\text{S}_8$ -8 in 1 M KOH: (a) for OER at the potential step of 270 mV vs. RHE; inset (a) polarization curves before (red) and after (black) the stability test of  $\text{Co}_9\text{S}_8$ ; (b) for HER at the potential step of 314 mV vs. RHE; inset (b) polarization curves before (red) and after (black) the stability test of  $\text{Co}_9\text{S}_8$

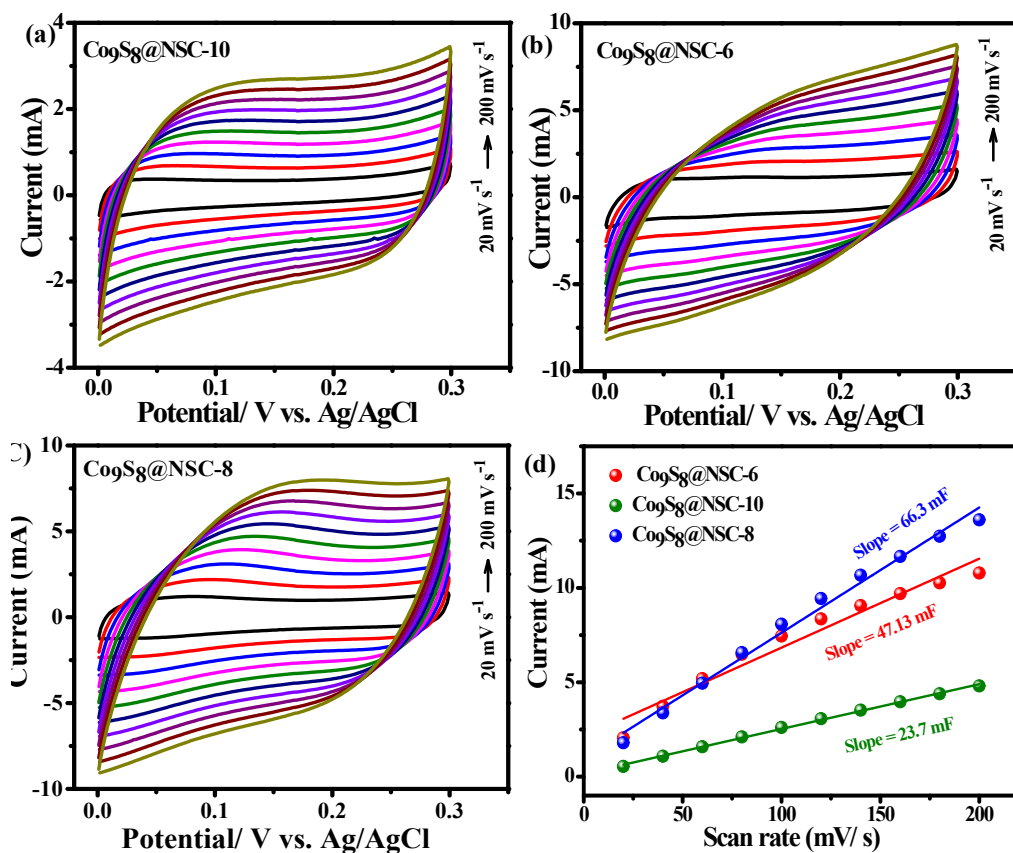

**Figure S7.** ECSA determination of synthesized electrocatalyst samples in 1 M KOH. Cyclic voltammograms at different scan rates (20-200  $\text{mV sec}^{-1}$ ) in non-Faradiac region of (a)  $\text{Co}_9\text{S}_8$ @NSC-10; (b)  $\text{Co}_9\text{S}_8$ @NSC-6 and (c)  $\text{Co}_9\text{S}_8$ @NSC-8. (d) The corresponding plot of scan rate vs. current.

**Table S2.** HER and OER performance of Co<sub>9</sub>S<sub>8</sub>@NSC and some other noble-metal-free electrocatalysts at 10 mA cm<sup>-2</sup> in 1.0 M KOH. (j: current density; η: overpotential)

| Catalysts                                                                      | OER                                    |                                     | HER                                    |                                     | Reference |
|--------------------------------------------------------------------------------|----------------------------------------|-------------------------------------|----------------------------------------|-------------------------------------|-----------|
|                                                                                | η (for J=10 mA cm <sup>-2</sup> ) [mV] | Tafel Slope [mV dec <sup>-1</sup> ] | η (for J=10 mA cm <sup>-2</sup> ) [mV] | Tafel Slope [mV dec <sup>-1</sup> ] |           |
| Co <sub>9</sub> S <sub>8</sub> @NSC                                            | 120                                    | 48                                  | 267                                    | 85                                  | This work |
| Ni/Ni(OH) <sub>2</sub>                                                         | -                                      | -                                   | 300                                    | 128                                 | 1         |
| Porous Co-based film                                                           | -                                      | -                                   | 375                                    | -                                   | 2         |
| Co-NRCNT                                                                       | -                                      | -                                   | 370                                    | -                                   | 3         |
| Co <sub>9</sub> S <sub>8</sub> @MoS <sub>2</sub> /CNFs                         | 430                                    | 61                                  | -                                      | -                                   | 4         |
| FeCoNi-PS                                                                      | 162                                    | -                                   | 284                                    | -                                   | 5         |
| FeCoNi-P                                                                       | 235                                    | -                                   | 346                                    | -                                   | 5         |
| FeCoNi-S                                                                       | 244                                    | -                                   | 468                                    | -                                   | 5         |
| NiCo <sub>2</sub> S <sub>4</sub> NWs/NF                                        | 260                                    | 40                                  | 210                                    | 59                                  | 6         |
| MoS <sub>2</sub> /NiS yolk-shell microspheres                                  | 350                                    | 108                                 | 244                                    | 97                                  | 7         |
| Phosphorene quantum dot/ MoS <sub>2</sub> nanosheets                           | 370                                    | 46                                  | 600                                    | 162                                 | 8         |
| Co-FeS <sub>2</sub> nanospheres                                                | 324                                    | 50                                  | 267                                    | 58                                  | 9         |
| N-, O-, S-tridoped carbon encapsulated Co <sub>9</sub> S <sub>8</sub>          | 340                                    | 68                                  | 320                                    | 105                                 | 10        |
| Co <sub>9</sub> S <sub>8</sub> /N,S-rGO                                        | 266                                    | 75                                  | 332                                    | 131                                 | 11        |
| (Ni <sub>0.33</sub> Co <sub>0.67</sub> )S <sub>2</sub> nanowires/ carbon cloth | 216                                    | 78                                  | 334                                    | 127                                 | 12        |
| Ni-Mo-S nanowires                                                              | 390                                    | 75                                  | 290                                    | 103                                 | 13        |
| Co(OH) <sub>2</sub> /Ni-Co-S nanotube arrays                                   | 340                                    | 64                                  | 254                                    | 88                                  | 14        |
| N-carbon coated NiCo <sub>2</sub> S <sub>4</sub> hollow nanotubes              | 330                                    | 87                                  | 295                                    | 90                                  | 15        |
| (210)-Ni <sub>3</sub> S <sub>2</sub> nanosheets arrays                         | 260                                    | -                                   | 223                                    | -                                   | 16        |
| NiS microsphere                                                                | 335                                    | 89                                  | 158                                    | 83                                  | 17        |
| Ni(OH) <sub>2</sub> /Ni <sub>3</sub> S <sub>2</sub> nanosheets arrays          | 211                                    | 153                                 | 270                                    | 129                                 | 18        |



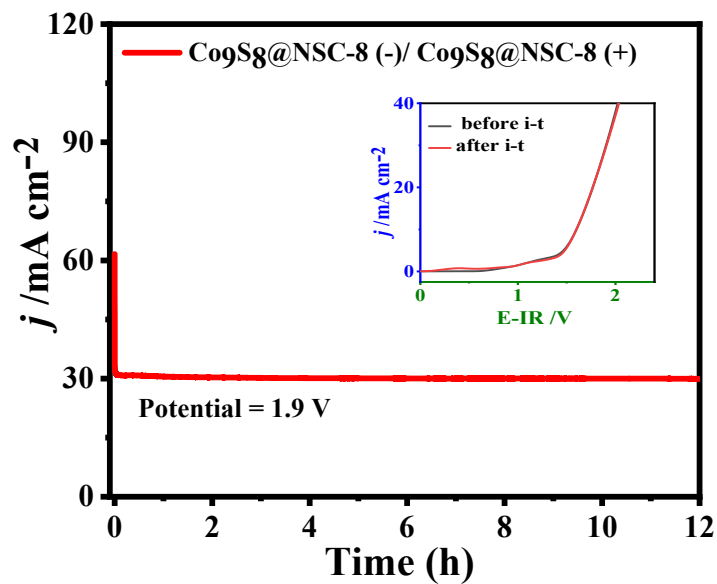

**Figure S8.** Long-term chronoamperometric (i-t curve) durability test at a potential step of 1.9 V using  $\text{Co}_9\text{S}_8@\text{NSC-8}$  at both electrodes in the two-electrode configuration in 1M KOH, inset depicts Polarization curves before (black) and after (red) stability test of  $\text{Co}_9\text{S}_8@\text{NSC-8}$ .

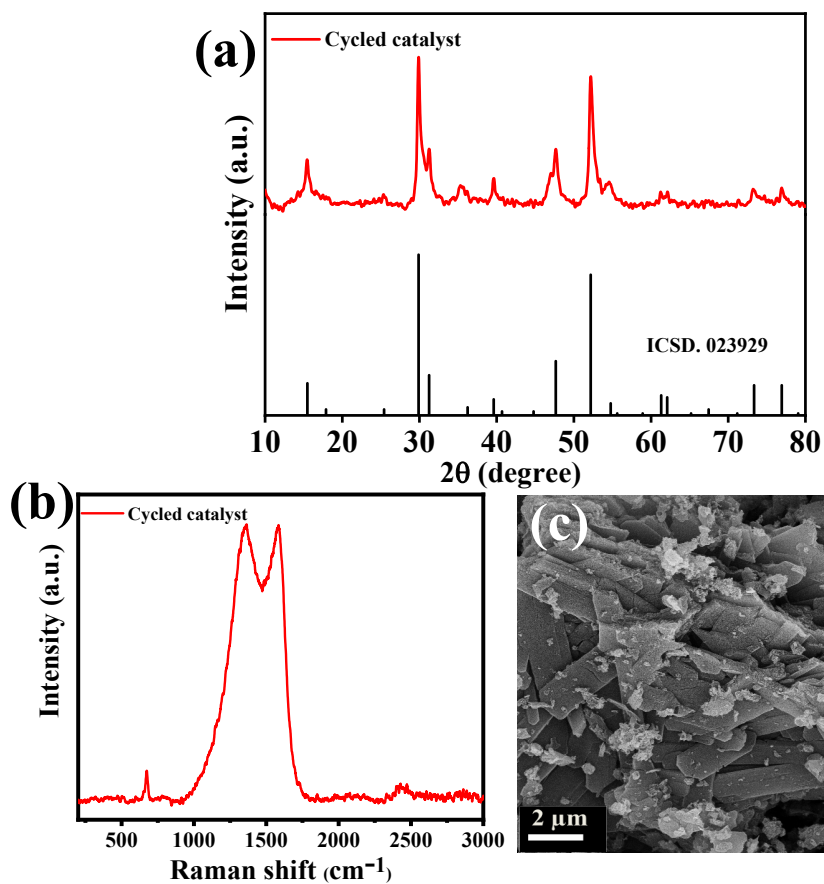

**Figure S9.** (a) XRD pattern, (b) Raman spectrum, and (c) FESEM image of a sample of  $\text{Co}_9\text{S}_8@\text{NSC-8}$  after being used as an electrocatalyst for water splitting in full-cell configuration in 1M KOH solution at a potential of 1.9 V for 12 h.

**Table S3.** Comparison of the full cell water-splitting activity of Co<sub>9</sub>S<sub>8</sub>@NSC catalyst with other reported bifunctional catalysts in basic medium.

| Catalysts                              | Cell Voltage (for J=10 mA cm <sup>-2</sup> ) [V] | Electrolyte | Reference |
|----------------------------------------|--------------------------------------------------|-------------|-----------|
| Co <sub>9</sub> S <sub>8</sub> @NSC    | 1.60                                             | 1M KOH      | This Work |
| Ni@NC-800/NF                           | 1.60                                             | 1M KOH      | 19        |
| NiSe/NF                                | 1.63                                             | 1M KOH      | 20        |
| Ni <sub>2</sub> P nanowires            | 1.63                                             | 1M KOH      | 21        |
| CoSe film                              | 1.65                                             | 1M KOH      | 22        |
| Ni/Mo <sub>2</sub> C-PC/NF             | 1.66                                             | 1M KOH      | 23        |
| Ni <sub>5</sub> P <sub>4</sub> /NF     | 1.69                                             | 1M KOH      | 24        |
| CoP <sub>x</sub> /NC                   | ~ 1.71                                           | 1M KOH      | 25        |
| Co-P film on Au foil                   | 1.73                                             | 1M KOH      | 26        |
| Ni <sub>3</sub> S <sub>2</sub> /NF     | 1.76                                             | 1M KOH      | 27        |
| Ni(OH) <sub>2</sub> /NiSe              | 1.78                                             | 1M KOH      | 28        |
| NiCo <sub>2</sub> S <sub>4</sub> NW/NF | 1.63                                             | 1M KOH      | 29        |
| CoOSeP@Co                              | 1.74                                             | 1M KOH      | 30        |
| RuO <sub>2</sub> / RuO <sub>2</sub>    | 1.45                                             | 1M KOH      | 31        |
| RuO <sub>2</sub> /Pt-C on CF           | 1.56                                             | 1M KOH      | 32        |
| Ir-C/Pt-C on EG                        | 1.62                                             | 1M KOH      | 33        |
| P/Pt                                   | >1.8                                             | 1M KOH      | 34        |
| IrO <sub>2</sub> /Pt-C                 | 1.6                                              | 1M KOH      | 35        |
| Pt-C/Pt-C                              | 1.75                                             | 1M KOH      | 35        |
| IrO <sub>2</sub> /IrO <sub>2</sub>     | >1.9                                             | 1M KOH      | 35        |
| Pt-C on Ni foam                        | 1.67                                             | 1M KOH      | 36        |
| RuO <sub>2</sub> /Pt-C both on Ti mesh | 1.57                                             | 1M KOH      | 37        |

## References:

- 1 N. Danilovic, R. Subbaraman, D. Strmcnik, K.-C. Chang, A. P. Paulikas, V. R. Stamenkovic and N. M. Markovic, *Angew. Chemie*, 2012, **124**, 12663–12666.
- 2 Y. Yang, H. Fei, G. Ruan and J. M. Tour, *Adv. Mater.*, 2015, **27**, 3175–3180.
- 3 X. Zou, X. Huang, A. Goswami, R. Silva, B. R. Sathe, E. Mikmeková and T. Asefa, *Angew. Chemie*, 2014, **126**, 4461–4465.
- 4 H. Zhu, J. Zhang, R. Yanzhang, M. Du, Q. Wang, G. Gao, J. Wu, G. Wu, M. Zhang, B. Liu, J. Yao and X. Zhang, *Adv. Mater.*, 2015, **27**, 4752–4759.
- 5 L. Yin, X. Ding, W. Wei, Y. Wang, Z. Zhu, K. Xu, Z. Zhao, H. Zhao, T. Yu and T. Yang, *Inorg. Chem. Front.*, 2020, **7**, 2388–2395.
- 6 A. Sivanantham, P. Ganesan and S. Shanmugam, *Adv. Funct. Mater.*, 2016, **26**, 4661–4672.
- 7 Q. Qin, L. Chen, T. Wei and X. Liu, *Small*, 2019, **15**, 1803639.
- 8 R. Prasannachandran, T. V. Vineesh, M. B. Lithin, R. Nandakishore and M. M. Shaijumon, *Chem. Commun.*, 2020, **56**, 8623–8626.
- 9 L. Gao, C. Guo, X. Liu, X. Ma, M. Zhao, X. Kuang, H. Yang, X. Zhu, X. Sun and Q. Wei, *New J. Chem.*, 2020, **44**, 1711–1718.
- 10 S. Huang, Y. Meng, S. He, A. Goswami, Q. Wu, J. Li, S. Tong, T. Asefa and M. Wu, *Adv. Funct. Mater.*, 2017, **27**, 1606585.
- 11 H. Liu, C. Y. Xu, Y. Du, F. X. Ma, Y. Li, J. Yu and L. Zhen, *Sci. Reports 2019 91*, 2019, **9**, 1–10.
- 12 Q. Zhang, C. Ye, X. L. Li, Y. H. Deng, B. X. Tao, W. Xiao, L. J. Li, N. B. Li and H. Q. Luo, *ACS Appl. Mater. Interfaces*, 2018, **10**, 27723–27733.
- 13 Z. Ma, H. Meng, M. Wang, B. Tang, J. Li and X. Wang, *ChemElectroChem*, 2018, **5**, 335–342.
- 14 F. Wu, X. Guo, G. Hao, Y. Hu and W. Jiang, *J. Solid State Electrochem.*, 2019, **23**, 2627–2637.
- 15 F. Li, R. Xu, Y. Li, F. Liang, D. Zhang, W. F. Fu and X. J. Lv, *Carbon N. Y.*, 2019, **145**, 521–528.
- 16 L. L. Feng, G. Yu, Y. Wu, G. D. Li, H. Li, Y. Sun, T. Asefa, W. Chen and X. Zou, *J. Am. Chem. Soc.*, 2015, **137**, 14023–14026.
- 17 W. Zhu, X. Yue, W. Zhang, S. Yu, Y. Zhang, J. Wang and J. Wang, *Chem. Commun.*, 2016, **52**, 1486–1489.
- 18 X. Du, Z. Yang, Y. Li, Y. Gong and M. Zhao, *J. Mater. Chem. A*, 2018, **6**, 6938–6946.
- 19 X. Wang, W. Li, D. Xiong and L. Liu, *J. Mater. Chem. A*, 2016, **4**, 5639–5646.
- 20 C. Tang, N. Cheng, Z. Pu, W. Xing and X. Sun, *Angew. Chemie Int. Ed.*, 2015, **54**, 9351–9355.
- 21 L. A. Stern, L. Feng, F. Song and X. Hu, *Energy Environ. Sci.*, 2015, **8**, 2347–2351.
- 22 T. Liu, Q. Liu, A. M. Asiri, Y. Luo and X. Sun, *Chem. Commun.*, 2015, **51**, 16683–16686.
- 23 Z.-Y. Yu, Y. Duan, M.-R. Gao, C.-C. Lang, Y.-R. Zheng and S.-H. Yu, *Chem. Sci.*, 2017, 968–973.
- 24 M. Ledendecker, S. Krickalderöñ, C. Papp, H. P. Steinrück, M. Antonietti and M. Shalom, *Angew. Chemie Int. Ed.*, 2015, **54**, 12361–12365.
- 25 B. You, N. Jiang, M. Sheng, S. Gul, J. Yano and Y. Sun, *Chem. Mater.*, 2015, **27**, 7636–7642.
- 26 J. A. Vigil and T. N. Lambert, *RSC Adv.*, 2015, **5**, 105814–105819.
- 27 L. L. Feng, G. Yu, Y. Wu, G. D. Li, H. Li, Y. Sun, T. Asefa, W. Chen and X. Zou, *J. Am. Chem. Soc.*, 2015, **137**, 14023–14026.

- 28 H. Liang, L. Li, F. Meng, L. Dang, J. Zhuo, A. Forticaux, Z. Wang and S. Jin, *Chem. Mater.*, 2015, **27**, 5702–5711.
- 29 A. Sivanantham, P. Ganesan and S. Shanmugam, *Adv. Funct. Mater.*, 2016, **26**, 4661–4672.
- 30 Y. F. Jiang, C. Z. Yuan, X. Zhou, Y. N. Liu, Z. W. Zhao, S. J. Zhao and A. W. Xu, *Electrochim. Acta*, 2018, **292**, 247–255.
- 31 Y. Dang, T. Wu, H. Tan, J. Wang, C. Cui, P. Kerns, W. Zhao, L. Posada, L. Wen and S. L. Suib, *Energy Environ. Sci.*, 2021, **14**, 5433–5443.
- 32 W. Li, X. Gao, D. Xiong, F. Xia, J. Liu, W. G. Song, J. Xu, S. M. Thalluri, M. F. Cerqueira, X. Fu and L. Liu, *Chem. Sci.*, 2017, **8**, 2952–2958.
- 33 Y. Hou, M. R. Lohe, J. Zhang, S. Liu, X. Zhuang and X. Feng, *Energy Environ. Sci.*, 2016, **9**, 478–483.
- 34 M. Ledendecker, S. Krickalderön, C. Papp, H. P. Steinrück, M. Antonietti and M. Shalom, *Angew. Chemie Int. Ed.*, 2015, **54**, 12361–12365.
- 35 N. Jiang, B. You, M. Sheng and Y. Sun, *Angew. Chemie Int. Ed.*, 2015, **54**, 6251–6254.
- 36 C. Tang, N. Cheng, Z. Pu, W. Xing and X. Sun, *Angew. Chemie Int. Ed.*, 2015, **54**, 9351–9355.
- 37 J. Tian, N. Cheng, Q. Liu, X. Sun, Y. He and A. M. Asiri, *J. Mater. Chem. A*, 2015, **3**, 20056–20059.
